# Supplementary material for: Determination of Sr to Ca ratio in solid carbonate, fluoride, and nitrate samples using the fundamental parameters of EDXRF: experimental and empirical evaluation of non-destructive assays in light matrices
Source: Royal Society of Chemistry journal article supplement (doi:10.1039/d1ja00417d), 2022-01-01
Supplement: d1ja00417d1.pdf [file d1ja00417d1.pdf]

**Supplementary Information**

ST-1 Effects of variation of counting time from 50 to 600 s, on various parameters

| Parameter monitored                       |               | Pure<br>CaCO <sub>3</sub><br>(Pellet A) | SrCO <sub>3</sub> to CaCO <sub>3</sub> in<br>the weight ratios of: |                       | Pure<br>SrCO <sub>3</sub><br>(Pellet D) | Observations                                                          |
|-------------------------------------------|---------------|-----------------------------------------|--------------------------------------------------------------------|-----------------------|-----------------------------------------|-----------------------------------------------------------------------|
|                                           |               |                                         | 1:2<br>(Pellet B)                                                  | 2: 1<br>(Pellet<br>C) |                                         |                                                                       |
| Dead time                                 |               | 1                                       | 16                                                                 | 25                    | 17                                      | All are constant.                                                     |
| Gross cts                                 |               | 1064 to<br>1078                         | 18295 to<br>18387                                                  | 28732 to<br>28632     | 19226 to<br>19446                       | All are increasing marginally, except C.                              |
| % of net counts at the ROI for            | Ca            | 97.6 to<br>98.1                         | 94.3 to<br>95.3                                                    | 88.6 to<br>88.8       | -7.6 to<br>20.1                         | Marginal variations for A, B and C. Substantial increase for D.       |
|                                           | Sr            | 77.1 to<br>75.5                         | 98.0 to<br>97.9                                                    | 97.8 to<br>97.9       | 97.9 to<br>98.0                         | All are decreasing marginally, except C.                              |
|                                           | Compton peak  | 52.4 to<br>46.2                         | 42.9 to<br>42.2                                                    | 36.2 to<br>35.4       | 35.8 to<br>31.8                         | All are decreasing                                                    |
|                                           | Rayleigh peak | 61.7 to<br>56.8                         | 59.7 to<br>60.2                                                    | 60.4 to<br>63.0       | 63.3 to<br>60.1                         | Decreasing for A and D. Increasing for B and C.                       |
| Net counts per unit time (count rate) for | Ca            | 344.0 to<br>343.2                       | 166.5 to<br>162.1                                                  | 75.5 to<br>69.6       | -0.44 to<br>1.2                         | All are decreasing, except D                                          |
|                                           | Sr            | 30.4 to<br>28.5                         | 16006.6 to<br>15571.5                                              | 26502 to<br>25964     | 17611 to<br>17240                       | All are decreasing.                                                   |
|                                           | Compton peak  | 101.9 to<br>88.8                        | 51.2 to<br>49.5                                                    | 30.9 to<br>28.8       | 18.7 to<br>15.7                         | All are decreasing.                                                   |
|                                           | Rayleigh peak | 64.2 to<br>57.1                         | 49.5 to<br>48.4                                                    | 39.4 to<br>40.9       | 25.4 to<br>24.2                         | All are decreasing, except C.                                         |
| Ratio of net counts:                      | Sr to Ca      | 0.0885 to<br>0.0830                     | 96.11 to<br>96.15                                                  | 360.6 to<br>367.0     | 40026 to<br>14527                       | Increasing marginally for A, B and C. Increasing substantially for D. |
|                                           | Rayleigh to   | 0.6305 to                               | 0.9676 to                                                          | 1.2744                | 1.4604 to                               | All are increasing.                                                   |

|  |         |        |        |              |        |  |
|--|---------|--------|--------|--------------|--------|--|
|  | Compton | 0.6435 | 0.9777 | to<br>1.4218 | 1.5383 |  |
|--|---------|--------|--------|--------------|--------|--|

ST-2 Effects of variation of emission current from 50 to 200  $\mu$ A on various measurands

| Parameter monitored             |                     | Pure CaCO <sub>3</sub> (Pellet A) | SrCO <sub>3</sub> to CaCO <sub>3</sub> in the weight ratios of: |                  | Pure SrCO <sub>3</sub> (Pellet D) | Observations                                                    |
|---------------------------------|---------------------|-----------------------------------|-----------------------------------------------------------------|------------------|-----------------------------------|-----------------------------------------------------------------|
|                                 |                     |                                   | 1:2 (Pellet B)                                                  | 2: 1 (Pellet C)  |                                   |                                                                 |
| Dead time                       |                     | 3 to 22                           | 2 to 39                                                         | 4 to 55          | 4 to 41                           | All are increasing gradually.                                   |
| Gross crs                       |                     | 148 to 2928                       | 2366 to 49894                                                   | 15940 to 79040   | 4317 to 53442                     | All are increasing gradually.                                   |
| % of net counts at the ROI for  | Ca                  | 97.7 to 97.9                      | 97.2 to 95.9                                                    | 84.1 to 87.7     | 47.9 to 4.4                       | Marginal variations for A,B and C. Substantial reduction for D. |
|                                 | Sr                  | 97.7 to 97.9                      | 97.9 to 97.8                                                    | 97.9 to 97.8     | 98.1 to 97.9                      | All are decreasing marginally.                                  |
|                                 | Compton peak        | 77.3 to 75.8                      | 67.1 to 41.8                                                    | 57.3 to 35.3     | 37.0 to 38.1                      | Decreasing for A, B and C. Increasing for D.                    |
|                                 | Rayleigh peak       | 41.4 to 47.9                      | 65.6 to 56.9                                                    | 71.1 to 59.1     | 57.8 to 61.0                      | Increasing for A and D. Decreasing for B and C.                 |
| Net counts per unit current for | Ca                  | 50.9 to 55.4                      | 40.4 to 341                                                     | 15.1 to 127      | 0.0155 to 0.0159                  | All are increasing.                                             |
|                                 | Sr                  | 94.6 to 483                       | 3750 to 32820                                                   | 6064 to 48118    | 83.3 to 106.2                     | All are increasing.                                             |
|                                 | Compton peak        | 8.5 to 39.9                       | 19.3 to 105.3                                                   | 10.8 to 55.1     | 0.060 to 0.115                    | All are increasing.                                             |
|                                 | Rayleigh peak       | 21.5 to 128.1                     | 12.6 to 98.4                                                    | 11.6 to 71.1     | 0.079 to 0.152                    | All are increasing.                                             |
| Ratio of net counts:            | Sr to Ca            | 0.0903 to 0.0825                  | 92.86 to 96.49                                                  | 400.5 to 380.3   | 5368 to 66751                     | Marginal decrease for A, B and C. Substantial increase for D.   |
|                                 | Rayleigh to Compton | 0.6660 to 0.6081                  | 0.6556 to 0.8645                                                | 1.0683 to 1.2909 | 1.3256 to 1.3189                  | Marginal decrease for A and D. Marginal increase                |

|  |  |  |  |  |  |              |
|--|--|--|--|--|--|--------------|
|  |  |  |  |  |  | for B and C. |
|--|--|--|--|--|--|--------------|

ST-3 Effects of variation of applied voltage from 20 to 40 kV, on various parameters

| Parameter monitored             |               | Pure CaCO <sub>3</sub> (Pellet A) | SrCO <sub>3</sub> to CaCO <sub>3</sub> in the weight ratios of: |                 | Pure SrCO <sub>3</sub> (Pellet D) | Observations                                                                    |
|---------------------------------|---------------|-----------------------------------|-----------------------------------------------------------------|-----------------|-----------------------------------|---------------------------------------------------------------------------------|
|                                 |               |                                   | 1:2 (Pellet B)                                                  | 2: 1 (Pellet C) |                                   |                                                                                 |
| Dead time                       |               | 10 to 2                           | 1 to 25                                                         | 2 to 36         | 1 to 26                           | All are increasing gradually, except for A.                                     |
| Gross crs                       |               | 57 to 1685                        | 500 to 29075                                                    | 749 to 45648    | 539 to 30637                      | All are increasing gradually.                                                   |
| % of net counts at the ROI for  | Ca            | 99.9 to 98.1                      | 95.3 to 94.1                                                    | 97.1 to 88.1    | -18.8 to 10.3                     | All are decreasing, except for D.                                               |
|                                 | Sr            | 59.3 to 75.3                      | 97.4 to 97.9                                                    | 97.7 to 97.9    | 97.8 to 97.9                      | All are elevated marginally.                                                    |
|                                 | Compton peak  | 15.4 to 51.1                      | -44.1 to 49.1                                                   | 19.0 to 49.5    | 52.0 to 31.9                      | All are rising gradually and reaching the same value, except D.                 |
|                                 | Rayleigh peak | 4.8 to 56.8                       | 44.9 to 68.0                                                    | 56.5 to 68.0    | 25.3 to 65.7                      | All are increasing, and reaching the same value at higher potentials, except A. |
| Net counts per unit voltage for | Ca            | 121 to 1330                       | 41 to 841                                                       | 19 to 414       | -0.15 to 2.6                      | All are increasing.                                                             |
|                                 | Sr            | 11.1 to 91.3                      | 1940 to 87100                                                   | 3000 to 157500  | 2230 to 72126                     | All are increasing.                                                             |
|                                 | Compton peak  | 0.7 to 287                        | -1.5 to 347                                                     | 0.4 to 262      | 0.7 to 68.2                       | All are increasing.                                                             |
|                                 | Rayleigh peak | 2.4 to 168                        | 55 to 340                                                       | 51 to 316       | 0.05 to 123                       | All are increasing.                                                             |
| Ratio of net counts:            | Sr to Ca      | 0.0925 to 0.0811                  | 47.7 to 98.3                                                    | 161.4 to 377.8  | 14865 to 28010                    | All are increasing.                                                             |
|                                 | Rayleigh to   | 0 to                              | 0 to                                                            | 0 to            | 0.0769 to                         | All are increasing.                                                             |

|  |         |        |        |        |        |  |
|--|---------|--------|--------|--------|--------|--|
|  | Compton | 0.6006 | 0.8919 | 1.0918 | 1.8035 |  |
|--|---------|--------|--------|--------|--------|--|

ST-4 ROI of various X-rays peaks and the counts data for the representative EDXRF spectrum shown in Fig. 6

| Identification of the peak | ROI (keV)      | Gross counts at the ROI | Net counts at the ROI | % of net counts at the ROI |
|----------------------------|----------------|-------------------------|-----------------------|----------------------------|
| Ca                         | 3.46 to 3.84   | 18194                   | 17310                 | 95.1                       |
| Sr                         | 13.70 to 14.44 | 1675915                 | 1640599               | 97.9                       |
| Compton                    | 18.50 to 19.84 | 12577                   | 5809                  | 46.2                       |
| Rayleigh                   | 19.90 to 20.52 | 8593                    | 5207                  | 60.6                       |

ST-5 Calculated values of the mass thickness ( $\text{mg cm}^{-2}$ ) for thin, thick and critical thickness ( $\mu\text{m}$ ) of the samples for 300 mg mixtures / pellets, having 10 mm diameter

| Sl. No. | Description                                       | Mass thickness ( $\text{mg cm}^{-2}$ ) |       |               |       | $t_{\text{crit,Ca}}$ ( $\mu\text{m}$ ) | $t_{\text{crit,Sr}}$ ( $\mu\text{m}$ ) |
|---------|---------------------------------------------------|----------------------------------------|-------|---------------|-------|----------------------------------------|----------------------------------------|
|         |                                                   | For Ca X-rays                          |       | For Sr X-rays |       |                                        |                                        |
|         |                                                   | Thin                                   | Thick | Thin          | Thick |                                        |                                        |
| 1       | Pure $\text{CaCO}_3$                              | 0.43                                   | 19.67 | 2.93          | 135.1 | 1.19                                   | 8.14                                   |
| 2       | Pure $\text{CaF}_2$                               | 0.34                                   | 15.67 | 2.29          | 105.7 | 0.94                                   | 6.37                                   |
| 3       | 1:2 $\text{SrCO}_3$ to $\text{CaCO}_3$            | 0.19                                   | 8.94  | 2.03          | 93.4  | 0.54                                   | 5.63                                   |
| 4       | 1:1 $\text{SrCO}_3$ to $\text{CaCO}_3$            | 0.15                                   | 7.02  | 1.75          | 80.9  | 0.42                                   | 4.87                                   |
| 5       | 2:1 $\text{SrCO}_3$ to $\text{CaCO}_3$            | 0.13                                   | 5.78  | 1.55          | 71.3  | 0.35                                   | 4.30                                   |
| 6       | 1:2 $\text{SrCO}_3$ to $\text{CaF}_2$             | 0.18                                   | 8.29  | 1.80          | 82.7  | 0.50                                   | 4.99                                   |
| 7       | 1:1 $\text{SrCO}_3$ to $\text{CaF}_2$             | 0.15                                   | 6.71  | 1.62          | 74.6  | 0.40                                   | 4.50                                   |
| 8       | 2:1 $\text{SrCO}_3$ to $\text{CaF}_2$             | 0.12                                   | 5.64  | 1.48          | 68.0  | 0.34                                   | 4.10                                   |
| 9       | 1:2 $\text{Sr}(\text{NO}_3)_2$ to $\text{CaCO}_3$ | 0.23                                   | 10.76 | 2.39          | 110.3 | 0.65                                   | 6.64                                   |
| 10      | 1:1 $\text{Sr}(\text{NO}_3)_2$ to $\text{CaCO}_3$ | 0.19                                   | 8.77  | 2.19          | 101.0 | 0.53                                   | 6.08                                   |
| 11      | 2:1 $\text{Sr}(\text{NO}_3)_2$ to $\text{CaCO}_3$ | 0.16                                   | 7.40  | 2.02          | 93.1  | 0.45                                   | 5.61                                   |
| 12      | 1:2 $\text{Sr}(\text{NO}_3)_2$ to $\text{CaF}_2$  | 0.21                                   | 9.84  | 2.08          | 95.8  | 0.59                                   | 5.77                                   |
| 13      | 1:1 $\text{Sr}(\text{NO}_3)_2$ to $\text{CaF}_2$  | 0.18                                   | 8.30  | 1.98          | 91.5  | 0.50                                   | 5.51                                   |
| 14      | 2:1 $\text{Sr}(\text{NO}_3)_2$ to $\text{CaF}_2$  | 0.16                                   | 7.17  | 1.90          | 87.5  | 0.43                                   | 5.27                                   |
| 15      | Pure $\text{SrCO}_3$                              | 0.09                                   | 4.27  | 1.25          | 57.7  | 0.26                                   | 3.48                                   |
| 16      | Pure $\text{Sr}(\text{NO}_3)_2$                   | 0.12                                   | 5.64  | 1.75          | 80.6  | 0.34                                   | 4.86                                   |



ST-6 Comparison between the calculated and measured ratio of net counts of Sr to Ca in synthetic standards

| Targeted composition mixture / pellet                       | Mass absorption coefficient for |                        |                        | Weight ratio of Sr to Ca, taken during measurements | Ratio of net counts, Sr to Ca |                      |                                         |                    |
|-------------------------------------------------------------|---------------------------------|------------------------|------------------------|-----------------------------------------------------|-------------------------------|----------------------|-----------------------------------------|--------------------|
|                                                             | X-ray source                    | Ca $K_{\alpha}$ X-rays | Sr $K_{\alpha}$ X-rays |                                                     | Calculated, $R_{cal}$         | Measured, $R_{meas}$ | Absolute error ( $R_{cal} - R_{meas}$ ) | Relative error (%) |
| ~1:2 SrCO <sub>3</sub> to CaCO <sub>3</sub>                 | 16.538                          | 348.279                | 18.381                 | 0.753                                               | 76.45                         | 85.51                | -9.06                                   | -10.5              |
| ~1:1 SrCO <sub>3</sub> to CaCO <sub>3</sub>                 | 21.958                          | 442.396                | 18.354                 | 1.453                                               | 140.97                        | 148.15               | -7.18                                   | -4.8               |
| ~2:1 SrCO <sub>3</sub> to CaCO <sub>3</sub>                 | 27.379                          | 536.514                | 18.328                 | 2.906                                               | 259.47                        | 249.43               | +10.04                                  | +4.0               |
| ~1:2 SrCO <sub>3</sub> to CaF <sub>2</sub>                  | 17.577                          | 375.439                | 21.820                 | 0.544                                               | 56.94                         | 63.43                | -6.49                                   | -10.2              |
| ~1:1 SrCO <sub>3</sub> to CaF <sub>2</sub>                  | 22.737                          | 462.766                | 20.934                 | 1.163                                               | 106.13                        | 114.00               | -7.87                                   | -6.9               |
| ~2:1 SrCO <sub>3</sub> to CaF <sub>2</sub>                  | 27.898                          | 550.094                | 20.047                 | 2.194                                               | 197.78                        | 182.20               | +15.58                                  | +8.6               |
| ~1:2 Sr(NO <sub>3</sub> ) <sub>2</sub> to CaCO <sub>3</sub> | 12.770                          | 290.308                | 16.796                 | 0.493                                               | 59.36                         | 64.87                | -5.51                                   | -8.5               |
| ~1:1 Sr(NO <sub>3</sub> ) <sub>2</sub> to CaCO <sub>3</sub> | 16.306                          | 355.441                | 15.977                 | 1.018                                               | 115.46                        | 110.55               | +4.91                                   | +4.4               |
| ~2:1 Sr(NO <sub>3</sub> ) <sub>2</sub> to CaCO <sub>3</sub> | 19.842                          | 420.573                | 15.159                 | 2.555                                               | 222.49                        | 221.52               | +0.97                                   | +0.44              |
| ~1:2 Sr(NO <sub>3</sub> ) <sub>2</sub> to CaF <sub>2</sub>  | 13.808                          | 317.468                | 20.235                 | 0.431                                               | 43.96                         | 39.98                | +3.98                                   | +9.9               |
| ~1:1 Sr(NO <sub>3</sub> ) <sub>2</sub> to CaF <sub>2</sub>  | 17.085                          | 375.811                | 18.557                 | 0.806                                               | 86.22                         | 80.12                | +6.10                                   | +7.6               |
| ~2:1 Sr(NO <sub>3</sub> ) <sub>2</sub> to CaF <sub>2</sub>  | 20.361                          | 434.153                | 16.878                 | 1.632                                               | 168.34                        | 174.91               | -6.57                                   | -3.8               |
